# Supplementary material for: An ultrathin Li-doped perovskite SEI film with high Li ion flux for a fast charging lithium metal battery
Source: Royal Society of Chemistry journal article supplement (doi:10.1039/d4ya00507d), 2024-01-01
Supplement: d4ya00507d1.pdf [file d4ya00507d1.pdf]

## Supporting information

### An ultrathin Li doped perovskite SEI film with high Li ion flux for fast charging lithium metal battery

Ruliang Liu\*, Wenli Feng, Liangzhou Fang, Huiping Deng, Ling Lin, MinChang Chen, Jun-Xing Zhong \* and Wei Yin

School of Chemistry and Materials Science, Guangdong University of Education

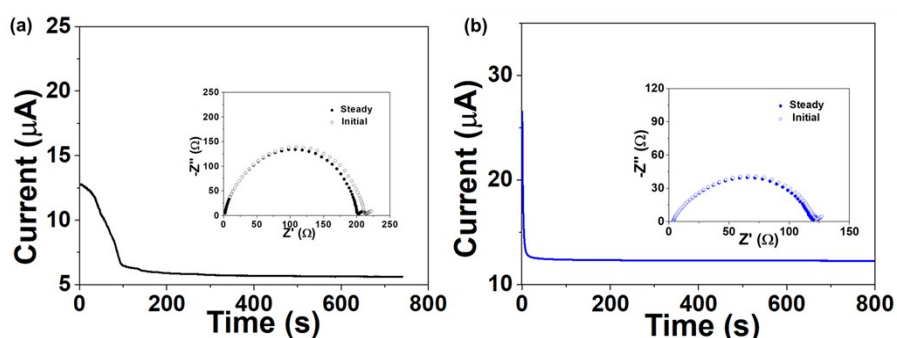

**Figure S1.** Chronoamperometry profiles of Li/Li symmetric cells with (a) bare Li and (b) at Li@Li-CspbCl<sub>3</sub>10 mV of polarization (inset: Nyquist plots before and after polarization).

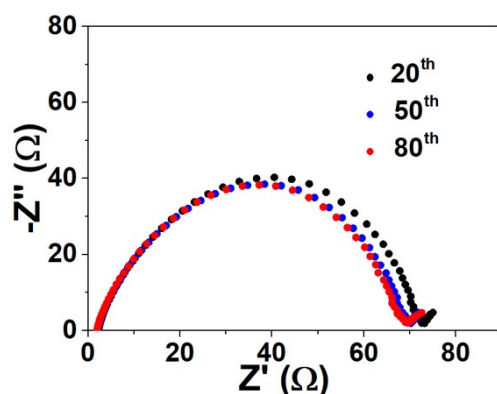

**Figure S2.** Nyquist plots of symmetric Li/Li cell with Li-CsPbCl<sub>3</sub> SEI film at different cycles (20<sup>th</sup>, 50<sup>th</sup> and 80<sup>th</sup>).

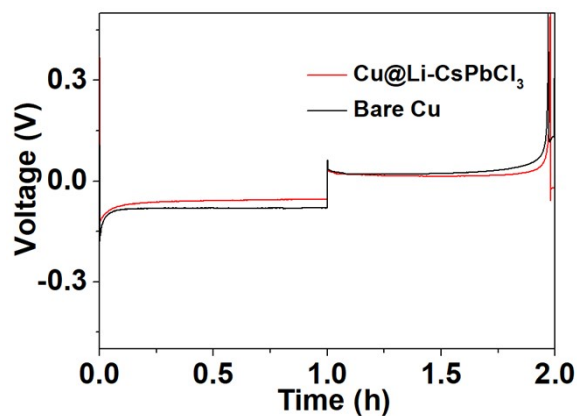

**Figure S3.** The first voltage-time curves for Li/Cu cells with bare Cu and Cu@ Li-CsPbCl<sub>3</sub> film at a current density of 1 mA cm<sup>-2</sup>.

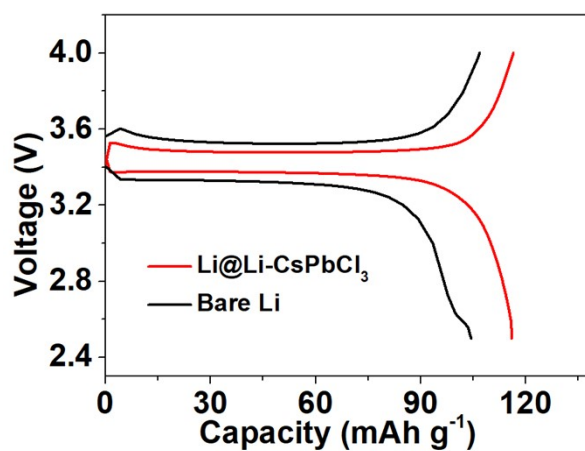

**Figure S4.** The first charge-discharge profiles of Li/LiFePO<sub>4</sub> cells with bare Li and Li@Li-CsPbCl<sub>3</sub> anodes at 3 C.
